# Supplementary material
Source: Elsevier journal article supplement (https://www.sciencedirect.com/science/article/pii/S2529993X1830025X)
Supplement: mmc1 [file S2529993X1830025X:mmc1.docx]

**Tabla suplementaria 1: Detalle/Rango de los escenarios alternativos del análisis de sensibilidad.**

| **Estrategia** | **Escenario de *Voluntad de optimización* mínimo*** | **Escenario de *Voluntad de optimización* máximo**** |
| --- | --- | --- |
| ABC/3TC+ ATV/r a ABC/3TC + ATV | 32,5% | 80,0% |
| TDF/FTC + LPV/r a LPV/r + 3TC | 30,0% | 90,0% |
| ABC/3TC+ LPV/r a LPV/r + 3TC | 25,0% | 80,0% |
| TDF/FTC + ATV/r a ATV/r + 3TC | 80,0% | 90,0% |
| TDF/FTC + DRV/r a ATV/r + 3TC | 10,0% | 90,0% |
| TDF/FTC + LPV/r a ATV/r + 3TC | 30,0% | 90,0% |
| ABC/3TC+ ATV/r a ATV/r + 3TC | 60,0% | 90,0% |
| ABC/3TC + DRV/r a ATV/r + 3TC | 10,0% | 90,0% |
| ABC/3TC+ LPV/r a ATV/r + 3TC | 30,0% | 90,0% |
| TDF/FTC/EFV a ATV/r + 3TC | 5,0% | 80,0% |
| TDF/FTC + EFV a ATV/r + 3TC | 5,0% | 90,0% |
| ABC/3TC + EFV a ATV/r + 3TC | 5,0% | 80,0% |
| TDF/FTC + ATV/r a TDF/FTC/RPV | 10,0% | 80,0% |
| TDF/FTC + DRV/r a TDF/FTC/RPV | 30,0% | 80,0% |
| TDF/FTC + LPV/r a TDF/FTC/RPV | 10,0% | 80,0% |
| ABC/3TC+ ATV/r a TDF/FTC/RPV | 20,0% | 80,0% |
| ABC/3TC + DRV/r a TDF/FTC/RPV | 20,0% | 80,0% |
| ABC/3TC+ LPV/r a TDF/FTC/RPV | 20,0% | 80,0% |
| TDF/FTC/EFV a TDF/FTC/COBI/EVG | 2,0% | 80,0% |
| TDF/FTC + NVP a TDF/FTC/COBI/EVG | 2,0% | 80,0% |
| TDF/FTC + ATV/r a TDF/FTC/COBI/EVG | 5,0% | 80,0% |
| TDF/FTC + DRV/r a TDF/FTC/COBI/EVG | 5,0% | 80,0% |
| TDF/FTC + LPV/r a TDF/FTC/COBI/EVG | 5,0% | 80,0% |

* Valor mínimo de las respuestas individuales del panel de expertos; ** Valor máximo de las respuestas individuales del panel de expertos; ABC: abacavir; ATV: atazanavir; COBI: cobicistat; DRV: darunavir; EFV: efavirenz; EVG: elvitegravir; FTC: emtricitabina; IP/r: inhibidor de la proteasa potenciado con ritonavir; ITIAN: inhibidor transcriptasa inversa análogo de nucleósido o nucleótido; ITINN: inhibidor transcriptasa inversa no nucleósido; LPV: lopinavir; NVP: nevirapina; r: ritonavir; RPV: rilpivirina; TAR: tratamiento antirretroviral; TDF: tenofovir; 3TC: lamivudina.
